# Supplementary material for: The DNA methylome of DDR genes and benefit from RT or TMZ in IDH mutant low-grade glioma treated in EORTC 22033
Source: Acta Neuropathol. 2018 Jan 24;135(4):601–15. doi: 10.1007/s00401-018-1810-6 (PMC5978935; doi:10.1007/s00401-018-1810-6)
Supplement: Supplementary file 3 — Supplementary material 3 (XLSX 29 kb) [file 401_2018_1810_MOESM3_ESM.xlsx]

## Sheet: TableS3
	Table S3. Expression analyses for the 74 DDR genes differentially methylated between codeleted and non-codeleted group
	EntrezID	TCGA1.logFC	TCGA1.AveExpr	TCGA1.t	TCGA1.P.Value	TCGA1.adj.P.Val	TCGA1.rankup	TCGA1.rankdown	TCGA1.rankabs	TCGA2.logFC	TCGA2.AveExpr	TCGA2.t	TCGA2.P.Value	TCGA2.adj.P.Val	TCGA2.rankup	TCGA2.rankdown	TCGA2.rankabs	RnaseqID	Symbol	RegulationCD	DDRgene	chr	arm
	10054	-0.884645	6.80457	-11.9469	4.26165e-24	5.82425e-22	2	73	72	-1.00327	6.89631	-13.3314	7.81827e-28	3.20549e-25	1	74	74	UBA2|10054	UBA2	down	UBA2	19	q
	7015	2.85002	-3.66231	14.5437	2.30765e-31	9.46138e-29	74	1	74	2.78593	-3.67886	13.111	3.19839e-27	6.55669e-25	74	1	73	TERT|7015	TERT	up	TERT	5	p
	2475	-0.64186	6.32912	-9.28553	9.11818e-17	7.47691e-15	4	71	70	-0.806611	6.44322	-11.1699	7.77058e-22	1.06198e-19	2	73	72	MTOR|2475	MTOR	down	MTOR	1	p
	6924	-0.559702	5.86303	-9.70615	6.70842e-18	6.87614e-16	3	72	71	-0.61044	5.95914	-11.1132	1.11371e-21	1.14155e-19	3	72	71	TCEB3|6924	TCEB3	down	TCEB3	1	p
	8289	-0.598907	6.98004	-8.12288	1.01661e-13	4.16808e-12	8	67	65	-0.820245	7.10271	-10.5905	3.0509e-20	2.50174e-18	4	71	70	ARID1A|8289	ARID1A	down	ARID1A	1	p
	10286	-0.598567	4.99488	-12.3807	2.59327e-25	5.31621e-23	1	74	73	-0.535096	5.02316	-9.8915	2.44132e-18	1.66823e-16	5	70	69	BCAS2|10286	BCAS2	down	BCAS2	1	p
	10039	0.469466	5.05212	6.87961	1.18808e-10	2.43557e-09	68	7	55	0.754036	5.06389	9.31111	8.81726e-17	5.1644e-15	73	2	68	PARP3|10039	PARP3	up	PARP3	3	p
	64858	-0.645998	3.56405	-7.63151	1.76677e-12	6.03648e-11	10	65	63	-0.717086	3.70656	-8.84587	1.4953e-15	7.66341e-14	6	69	67	DCLRE1B|64858	DCLRE1B	down	DCLRE1B	1	p
	7398	-0.518025	5.38973	-8.40905	1.86488e-14	9.5575e-13	6	69	67	-0.610696	5.48629	-8.77429	2.30202e-15	1.0487e-13	7	68	66	USP1|7398	USP1	down	USP1	1	p
	1026	1.77463	6.10296	8.6465	4.49119e-15	2.63056e-13	73	2	68	1.71545	5.95155	8.5723	7.7294e-15	2.88096e-13	72	3	65	CDKN1A|1026	CDKN1A	up	CDKN1A	6	p
	2067	-0.622823	5.44654	-9.07797	3.26461e-16	2.23082e-14	5	70	69	-0.561229	5.46719	-8.54646	9.01845e-15	3.08131e-13	8	67	64	ERCC1|2067	ERCC1	down	ERCC1	19	q
	10459	-0.782973	5.21656	-7.57404	2.45475e-12	7.7419e-11	11	64	62	-0.782938	5.31584	-8.26751	4.71644e-14	1.48749e-12	9	66	63	MAD2L2|10459	MAD2L2	down	MAD2L2	1	p
	125476	0.30044	3.43396	4.34095	2.46802e-05	0.000168648	54	21	29	0.579531	3.50027	7.98472	2.46975e-13	7.23285e-12	71	4	62	INO80C|125476	INO80C	up	INO80C	18	q
	29781	0.357635	5.89872	5.53972	1.1763e-07	1.52064e-06	63	12	45	0.503375	5.8787	7.96522	2.76607e-13	7.56059e-12	70	5	61	NCAPH2|29781	NCAPH2	up	NCAPH2	22	q
	23583	0.316328	4.81173	7.51121	3.51221e-12	1.02858e-10	72	3	61	0.383772	4.81832	7.71694	1.15895e-12	2.7951e-11	69	6	60	SMUG1|23583	SMUG1	up	SMUG1	12	q
	55170	-0.517256	4.0573	-8.33518	2.89531e-14	1.31897e-12	7	68	66	-0.472313	4.15597	-7.4204	6.25083e-12	1.4238e-10	10	65	59	PRMT6|55170	PRMT6	down	PRMT6	1	p
	27343	0.275323	4.93318	5.36585	2.69322e-07	3.15491e-06	62	13	44	0.421495	4.89749	7.34453	9.57402e-12	2.06597e-10	68	7	58	POLL|27343	POLL	up	POLL	10	q
	2140	-0.623127	1.72265	-4.88351	2.44748e-06	2.38921e-05	22	53	40	-1.09069	1.87405	-7.32603	1.06196e-11	2.17702e-10	11	64	57	EYA3|2140	EYA3	down	EYA3	1	p
	6118	-0.390326	5.84656	-7.72495	1.03256e-12	3.84865e-11	9	66	64	-0.397827	5.89142	-7.12586	3.23363e-11	5.7643e-10	12	63	56	RPA2|6118	RPA2	down	RPA2	1	p
	197370	0.269505	5.9227	3.80497	0.000199551	0.0010227	51	24	20	0.447996	5.9189	7.02969	5.4918e-11	9.12555e-10	67	8	55	NSMCE1|197370	NSMCE1	up	NSMCE1	16	p
	4869	0.427569	7.89778	5.58506	9.45192e-08	1.29176e-06	64	11	46	0.53801	7.95652	7.02729	5.56436e-11	9.12555e-10	66	9	54	NPM1|4869	NPM1	up	NPM1	5	q
	50484	0.507343	5.77897	7.41208	6.16393e-12	1.57951e-10	71	4	59	0.466177	5.77883	6.90518	1.08442e-10	1.71004e-09	65	10	53	RRM2B|50484	RRM2B	up	RRM2B	8	q
	8863	-0.667387	5.81444	-5.25963	4.43017e-07	5.04548e-06	19	56	43	-0.877958	5.83261	-6.76189	2.35456e-10	3.57544e-09	13	62	52	PER3|8863	PER3	down	PER3	1	p
	80119	0.764771	0.504537	3.72398	0.000268894	0.00129702	47	28	16	1.47741	0.662987	6.68463	3.56414e-10	5.03895e-09	64	11	51	PIF1|80119	PIF1	up	PIF1	15	q
	5429	0.453468	4.4973	6.49949	9.15687e-10	1.70651e-08	67	8	53	0.461815	4.58432	6.59473	5.75531e-10	7.86559e-09	63	12	50	POLH|5429	POLH	up	POLH	6	p
	4193	0.363878	6.09981	7.07102	4.15316e-11	9.53296e-10	70	5	58	0.354603	6.12916	6.47668	1.07408e-09	1.37616e-08	62	13	49	MDM2|4193	MDM2	up	MDM2	12	q
	4904	-0.72657	8.15438	-6.74054	2.52602e-10	4.93176e-09	14	61	54	-0.621949	8.29431	-6.45055	1.23212e-09	1.53082e-08	14	61	48	YBX1|4904	YBX1	down	YBX1	1	p
	119392	0.388176	2.95197	5.87597	2.26252e-08	3.71053e-07	66	9	50	0.436039	2.92925	6.24533	3.58281e-09	4.32044e-08	61	14	47	C10orf78|119392	C10orf78	up	SFR1	10	q
	79840	0.305151	2.76059	4.80524	3.45554e-06	3.14838e-05	60	15	38	0.377675	2.84409	6.07309	8.64413e-09	9.79849e-08	60	15	46	NHEJ1|79840	NHEJ1	up	NHEJ1	2	q
	5438	-0.608631	4.74587	-7.41411	6.09333e-12	1.57951e-10	12	63	60	-0.468793	4.71909	-6.02092	1.12547e-08	1.21432e-07	15	60	45	POLR2I|5438	POLR2I	down	POLR2I	19	q
	2648	0.463046	6.80727	3.29037	0.00122365	0.00451979	42	33	8	0.823804	6.66693	6.00416	1.22477e-08	1.28758e-07	59	16	44	KAT2A|2648	KAT2A	up	KAT2A	17	q
	641	0.94406	3.23574	4.5887	8.79525e-06	7.51261e-05	59	16	36	1.27923	3.15512	5.87039	2.39226e-08	2.33531e-07	58	17	43	BLM|641	BLM	up	BLM	15	q
	8658	0.591769	7.19979	7.02892	5.23984e-11	1.1307e-09	69	6	56	0.480828	7.21616	5.84383	2.72945e-08	2.6025e-07	57	18	42	TNKS|8658	TNKS	up	TNKS	8	p
	5435	0.401165	6.80706	3.73274	0.00026042	0.0012711	48	27	17	0.632783	6.87144	5.70368	5.4408e-08	4.95717e-07	56	19	41	POLR2F|5435	POLR2F	up	POLR2F	22	q
	252969	0.267862	5.67618	4.84056	2.95883e-06	2.80742e-05	61	14	39	0.37559	5.63616	5.68908	5.84286e-08	5.20777e-07	55	20	40	NEIL2|252969	NEIL2	up	NEIL2	8	p
	7515	-0.336701	5.06633	-6.06666	8.65561e-09	1.47867e-07	16	59	51	-0.327814	5.10685	-5.47332	1.65316e-07	1.35559e-06	16	59	39	XRCC1|7515	XRCC1	down	XRCC1	19	q
	8864	0.454221	4.61516	4.44746	1.59162e-05	0.000118648	57	18	34	0.482396	4.60308	5.45792	1.77882e-07	1.43003e-06	54	21	38	PER2|8864	PER2	up	PER2	2	q
	1408	0.618886	6.82965	5.8139	3.08106e-08	4.67865e-07	65	10	49	0.557557	6.82973	5.37748	2.60266e-07	2.0521e-06	53	22	37	CRY2|1408	CRY2	up	CRY2	11	p
	10856	-0.481339	6.15404	-7.06963	4.1852e-11	9.53296e-10	13	62	57	-0.366781	6.18226	-5.30373	3.67774e-07	2.79236e-06	17	58	36	RUVBL2|10856	RUVBL2	down	RUVBL2	19	q
	2178	0.343229	3.16266	4.43281	1.69137e-05	0.000123832	56	19	33	0.41609	3.17609	5.23697	5.016e-07	3.67243e-06	52	23	35	FANCE|2178	FANCE	up	FANCE	6	p
	84126	0.306463	3.3586	4.36628	2.22507e-05	0.000157289	55	20	31	0.356362	3.38789	4.90669	2.24152e-06	1.5066e-05	51	24	34	ATRIP|84126	ATRIP	up	ATRIP	3	p
	4798	-0.281252	5.18529	-4.16108	5.08806e-05	0.000311359	29	46	24	-0.351255	5.2258	-4.81058	3.4231e-06	2.22773e-05	18	57	33	NFRKB|4798	NFRKB	down	NFRKB	11	q
	5883	-0.44246	3.38808	-5.06628	1.0779e-06	1.13318e-05	21	54	41	-0.406688	3.37769	-4.75897	4.28688e-06	2.70403e-05	19	56	32	RAD9A|5883	RAD9A	down	RAD9A	11	q
	348654	0.293985	2.62888	2.59279	0.0103758	0.0279873	40	35	3	0.630446	2.73375	4.74139	4.62663e-06	2.87412e-05	50	25	31	GEN1|348654	GEN1	up	GEN1	2	p
	896	0.311857	6.45061	4.57841	9.18773e-06	7.68769e-05	58	17	35	0.358023	6.40803	4.68649	5.8635e-06	3.50743e-05	49	26	30	CCND3|896	CCND3	up	CCND3	6	p
	51065	0.344969	5.13397	4.21975	4.02817e-05	0.000250235	53	22	25	0.410128	5.15477	4.68494	5.90275e-06	3.50743e-05	48	27	29	RPS27L|51065	RPS27L	up	RPS27L	15	q
	25788	-0.778097	0.974482	-5.70573	5.25186e-08	7.63588e-07	17	58	48	-0.721394	1.05048	-4.54904	1.0523e-05	5.91016e-05	20	55	28	RAD54B|25788	RAD54B	down	RAD54B	8	q
	9937	0.283884	4.21289	3.75597	0.000239145	0.00119572	50	25	19	0.300106	4.27045	4.46133	1.51869e-05	8.30215e-05	47	28	27	DCLRE1A|9937	DCLRE1A	up	DCLRE1A	10	q
	5890	-0.384325	1.00374	-4.35698	2.31147e-05	0.000160628	25	50	30	-0.386925	1.02808	-4.40987	1.879e-05	0.000100772	21	54	26	RAD51L1|5890	RAD51L1	down	RAD51B	14	q
	353497	-0.456246	0.858069	-4.23016	3.86372e-05	0.000247119	27	48	27	-0.451571	0.868244	-4.28739	3.09703e-05	0.000156763	22	53	25	POLN|353497	POLN	down	POLN	4	p
	9918	-0.440157	5.72637	-4.00124	9.49982e-05	0.000533551	31	44	22	-0.428932	5.80217	-4.26651	3.36918e-05	0.000166429	23	52	24	NCAPD2|9918	NCAPD2	down	NCAPD2	12	p
	91442	-0.456551	-0.530457	-3.70695	0.000286128	0.0013331	32	43	14	-0.481361	-0.354761	-4.15531	5.24924e-05	0.000253199	24	51	23	C19orf40|91442	C19orf40	down	FAAP24	19	q
	1663	0.557468	4.04144	3.39358	0.000863998	0.00340615	43	32	9	0.688638	4.0535	4.13997	5.57674e-05	0.000265868	46	29	22	DDX11|1663	DDX11	up	DDX11	12	p
	56655	-0.687036	4.1863	-6.19934	4.38879e-09	7.82349e-08	15	60	52	-0.410485	4.25412	-4.06381	7.51348e-05	0.000342281	25	50	21	POLE4|56655	POLE4	down	POLE4	2	p
	5427	0.685572	-0.861677	3.57185	0.00046486	0.00202758	45	30	13	0.929608	-0.804521	4.05881	7.66061e-05	0.000345149	45	30	20	POLE2|5427	POLE2	up	POLE2	14	q
	10519	-0.325201	5.72779	-3.46218	0.00068255	0.00282672	34	41	11	-0.332283	5.64157	-4.00134	9.56579e-05	0.000417231	26	49	19	CIB1|10519	CIB1	down	CIB1	15	q
	7157	0.434295	5.64053	3.21434	0.00157307	0.00546575	41	34	6	0.49393	5.85401	3.82774	0.000184487	0.000734367	44	31	18	TP53|7157	TP53	up	TP53	17	p
	2138	0.698678	4.79101	3.84481	0.000172021	0.000910275	52	23	21	0.696345	4.77174	3.6733	0.000325037	0.00123394	43	32	17	EYA1|2138	EYA1	up	EYA1	8	q
	1017	-0.472772	3.41895	-3.54757	0.000506503	0.00216319	33	42	12	-0.486985	3.51844	-3.5817	0.000451125	0.00160836	27	48	16	CDK2|1017	CDK2	down	CDK2	12	q
	22976	0.315943	3.8465	3.74029	0.000253315	0.00125131	49	26	18	0.302414	3.88631	3.5674	0.000474555	0.00167731	42	33	15	PAXIP1|22976	PAXIP1	up	PAXIP1	7	q
	27127	-0.4671	-3.93191	-3.15593	0.00190227	0.00649941	36	39	5	-0.497476	-3.96087	-3.4603	0.000690009	0.00230003	28	47	14	SMC1B|27127	SMC1B	down	SMC1B	22	q
	4255	-0.630878	2.029	-4.26663	3.33671e-05	0.000220148	26	49	28	-0.589442	1.88489	-3.45597	0.000700411	0.00231588	29	46	13	MGMT|4255	MGMT	down	MGMT	10	q
	994	0.276195	6.19449	3.3953	0.000858938	0.00340615	44	31	10	0.311112	6.25322	3.22541	0.00152218	0.00445781	41	34	12	CDC25B|994	CDC25B	up	CDC25B	20	p
	6240	0.280013	5.68406	3.71629	0.00027655	0.00130328	46	29	15	0.263505	5.74446	3.21333	0.00158363	0.00459238	40	35	11	RRM1|6240	RRM1	up	RRM1	11	p
	898	-0.515873	1.37824	-5.70001	5.40099e-08	7.63588e-07	18	57	47	-0.351928	1.45679	-3.07972	0.00243501	0.00670037	30	45	10	CCNE1|898	CCNE1	down	CCNE1	19	q
	3014	-0.465926	5.60366	-4.64692	6.86169e-06	5.98573e-05	23	52	37	-0.307593	5.67384	-3.05215	0.00265655	0.00726123	31	44	9	H2AFX|3014	H2AFX	down	H2AFX	11	q
	64859	-0.694136	2.01142	-5.11187	8.75763e-07	9.44902e-06	20	55	42	-0.371782	2.07291	-3.02035	0.00293508	0.00786525	32	43	8	OBFC2A|64859	OBFC2A	down	NABP1	2	q
	8438	-0.864527	0.566679	-4.36934	2.19732e-05	0.000157289	24	51	32	-0.666148	0.681181	-2.94818	0.00366979	0.00934543	33	42	7	RAD54L|8438	RAD54L	down	RAD54L	1	p
	5424	-0.42246	3.75507	-4.08923	6.75132e-05	0.000389865	30	45	23	-0.308368	3.77862	-2.69953	0.00768176	0.0181007	34	41	6	POLD1|5424	POLD1	down	POLD1	19	q
	1647	-0.412112	4.60068	-2.33465	0.0207673	0.0528857	38	37	2	-0.395396	4.57974	-2.38445	0.0182624	0.0385959	35	40	5	GADD45A|1647	GADD45A	down	GADD45A	1	p
	27030	-0.30863	4.14564	-2.12234	0.0353028	0.084152	39	36	1	-0.298066	4.17565	-2.08808	0.0383564	0.0721383	36	39	4	MLH3|27030	MLH3	down	MLH3	14	q
	11200	-0.613174	1.16857	-4.22669	3.91775e-05	0.000247119	28	47	26	-0.31041	1.3433	-2.00778	0.0463304	0.0848013	37	38	3	CHEK2|11200	CHEK2	down	CHEK2	22	q
	11144	-0.559947	-3.25795	-3.26557	0.00132877	0.00477892	35	40	7	-0.319206	-3.37563	-1.93442	0.0548061	0.0968557	38	37	2	DMC1|11144	DMC1	down	DMC1	22	q
	63967	-0.711622	-0.313222	-2.74561	0.00671046	0.0195127	37	38	4	-0.539709	0.124705	-1.91852	0.0568058	0.0992545	39	36	1	CLSPN|63967	CLSPN	down	CLSPN	1	p

## Sheet: Description
Description of the variables
Variables	Description
EntrezID	Entrez identifiant
TCGA1.logFC	Expression fold change between codeleted and non-codeleted group for TCGA1
TCGA1.AveExpr	Average expression for TCGA1
TCGA1.t	moderated t-statistic for TCGA1
TCGA1.P.Value	raw p-value for TCGA1
TCGA1.adj.P.Val	adjusted p-value for TCGA1 (fdr correction)
TCGA1.rankup	rank for upregulated gene
TCGA1.rankdown	rank for downregulated gene
TCGA1.rankabs	rank for upregulated and downregulated gene
TCGA2.logFC	Expression fold change between codeleted and non-codeleted group for TCGA2
TCGA2.AveExpr	Average expression for TCGA2
TCGA2.t	moderated t-statistic for TCGA2
TCGA2.P.Value	raw p-value for TCGA2
TCGA2.adj.P.Val	adjusted p-value for TCGA2 (fdr correction)
TCGA2.rankup	rank for upregulated gene
TCGA2.rankdown	rank for downregulated gene
TCGA2.rankabs	rank for upregulated and downregulated gene
RnaseqID	combination of EntrezID and Symbol
Symbol	Symbol gene names
RegulationCD	regulation direction (down or up)
DDRgene	Symbol gene names (Pear et al. 2015)
chr	chromosome
arm	chromosome arm
